# Supplementary material
Source: PubMed Central journal article supplement (PMC4382267)
Supplement: JCI73938sd.pdf [file JCI73938sd.pdf]

## Supplemental References for Tables 1-4

- S1. Liu B, Gulati AS, Cantillana V, Henry SC, Schmidt EA, Daniell X, Grossniklaus E, Schoenborn AA, Sartor RB, and Taylor GA. *Irgm1*-deficient mice exhibit Paneth cell abnormalities and increased susceptibility to acute intestinal inflammation. *Am J Physiol Gastrointest Liver Physiol*. 2013;305(8):G573-84.
- S2. Marinelli S, Nazio F, Tinari A, Ciarlo L, D'Amelio M, Pieroni L, Vacca V, Urbani A, Cecconi F, Malorni W, et al. Schwann cell autophagy counteracts the onset and chronification of neuropathic pain. *Pain*. 2014;155(1):93-107.
- S3. Dere E, Dahm L, Lu D, Hammerschmidt K, Ju A, Tantra M, Kastner A, Chowdhury K, and Ehrenreich H. Heterozygous *ambra1* deficiency in mice: a genetic trait with autism-like behavior restricted to the female gender. *Front Behav Neurosci*. 2014;8(181).
- S4. Marino G, Fernandez AF, Cabrera S, Lundberg YW, Cabanillas R, Rodriguez F, Salvador-Montoliu N, Vega JA, Germana A, Fueyo A, et al. Autophagy is essential for mouse sense of balance. *J Clin Invest*. 2010;120(7):2331-44.
- S5. Rodriguez-Muela N, Germain F, Marino G, Fitze PS, and Boya P. Autophagy promotes survival of retinal ganglion cells after optic nerve axotomy in mice. *Cell Death Differ*. 2012;19(1):162-9.
- S6. Marino G, Salvador-Montoliu N, Fueyo A, Knecht E, Mizushima N, and Lopez-Otin C. Tissue-specific autophagy alterations and increased tumorigenesis in mice deficient in *Atg4C/autophagin-3*. *J Biol Chem*. 2007;282(25):18573-83.
- S7. Razani B, Feng C, Coleman T, Emanuel R, Wen H, Hwang S, Ting JP, Virgin HW, Kastan MB, and Semenkovich CF. Autophagy links inflammasomes to atherosclerotic progression. *Cell Metab*. 2012;15(4):534-44.
- S8. Liao X, Sluimer JC, Wang Y, Subramanian M, Brown K, Pattison JS, Robbins J, Martinez J, and Tabas I. Macrophage autophagy plays a protective role in advanced atherosclerosis. *Cell Metab*. 2012;15(4):545-53.
- S9. Watson RO, Manzanillo PS, and Cox JS. Extracellular *M. tuberculosis* DNA targets bacteria for autophagy by activating the host DNA-sensing pathway. *Cell*. 2012;150(4):803-15.
- S10. Castillo EF, Dekonenko A, Arko-Mensah J, Mandell MA, Dupont N, Jiang S, Delgado-Vargas M, Timmins GS, Bhattacharya D, Yang H, et al. Autophagy protects against active tuberculosis by suppressing bacterial burden and inflammation. *Proc Natl Acad Sci U S A*. 2012;109(46):E3168-76.
- S11. Ni HM, Woolbright BL, Williams J, Copple B, Cui W, Luyendyk JP, Jaeschke H, and Ding WX. Nrf2 promotes the development of fibrosis and tumorigenesis in mice with defective hepatic autophagy. *J Hepatol*. 2014.
- S12. Takamura A, Komatsu M, Hara T, Sakamoto A, Kishi C, Waguri S, Eishi Y, Hino O, Tanaka K, and Mizushima N. Autophagy-deficient mice develop multiple liver tumors. *Genes Dev*. 2011;25(8):795-800.
- S13. Toshima T, Shirabe K, Fukuhara T, Ikegami T, Yoshizumi T, Soejima Y, Ikeda T, Okano S, and Maehara Y. Suppression of autophagy during liver regeneration impairs energy charge and hepatocyte senescence in mice. *Hepatology*. 2014.

- S14. Cadwell K, Liu JY, Brown SL, Miyoshi H, Loh J, Lennerz JK, Kishi C, Kc W, Carrero JA, Hunt S, et al. A key role for autophagy and the autophagy gene *Atg16l1* in mouse and human intestinal Paneth cells. *Nature*. 2008;456(7219):259-63.
- S15. Benjamin JL, Sumpter R, Jr., Levine B, and Hooper LV. Intestinal epithelial autophagy is essential for host defense against invasive bacteria. *Cell Host Microbe*. 2013;13(6):723-34.
- S16. Hara T, Nakamura K, Matsui M, Yamamoto A, Nakahara Y, Suzuki-Migishima R, Yokoyama M, Mishima K, Saito I, Okano H, et al. Suppression of basal autophagy in neural cells causes neurodegenerative disease in mice. *Nature*. 2006;441(7095):885-9.
- S17. Orvedahl A, MacPherson S, Sumpter R, Jr., Tallozy Z, Zou Z, and Levine B. Autophagy protects against Sindbis virus infection of the central nervous system. *Cell Host Microbe*. 2010;7(2):115-27.
- S18. Lee HK, Mattei LM, Steinberg BE, Alberts P, Lee YH, Chervonsky A, Mizushima N, Grinstein S, and Iwasaki A. In vivo requirement for Atg5 in antigen presentation by dendritic cells. *Immunity*. 2010;32(2):227-39.
- S19. Hartleben B, Godel M, Meyer-Schwesinger C, Liu S, Ulrich T, Kobler S, Wiech T, Grahmmer F, Arnold SJ, Lindenmeyer MT, et al. Autophagy influences glomerular disease susceptibility and maintains podocyte homeostasis in aging mice. *J Clin Invest*. 2010;120(4):1084-96.
- S20. Liu S, Hartleben B, Kretz O, Wiech T, Igarashi P, Mizushima N, Walz G, and Huber TB. Autophagy plays a critical role in kidney tubule maintenance, aging and ischemia-reperfusion injury. *Autophagy*. 2012;8(5).
- S21. Morishita H, Eguchi S, Kimura H, Sasaki J, Sakamaki Y, Robinson ML, Sasaki T, and Mizushima N. Deletion of autophagy-related 5 (*Atg5*) and *Pik3c3* genes in the lens causes cataract independent of programmed organelle degradation. *J Biol Chem*. 2013;288(16):11436-47.
- S22. Nedjic J, Aichinger M, Emmerich J, Mizushima N, and Klein L. Autophagy in thymic epithelium shapes the T-cell repertoire and is essential for tolerance. *Nature*. 2008;455(7211):396-400.
- S23. Nicola AM, Albuquerque P, Martinez LR, Dal-Rosso RA, Saylor C, De Jesus M, Nosanchuk JD, and Casadevall A. Macrophage autophagy in immunity to *Cryptococcus neoformans* and *Candida albicans*. *Infect Immun*. 2012;80(9):3065-76.
- S24. Pengo N, Scolari M, Oliva L, Milan E, Mainoldi F, Raimondi A, Fagioli C, Merlini A, Mariani E, Pasqualetto E, et al. Plasma cells require autophagy for sustainable immunoglobulin production. *Nat Immunol*. 2013;14(3):298-305.
- S25. Nakai A, Yamaguchi O, Takeda T, Higuchi Y, Hikoso S, Taniike M, Omiya S, Mizote I, Matsumura Y, Asahi M, et al. The role of autophagy in cardiomyocytes in the basal state and in response to hemodynamic stress. *Nat Med*. 2007;13(5):619-24.
- S26. Inami Y, Waguri S, Sakamoto A, Kouno T, Nakada K, Hino O, Watanabe S, Ando J, Iwadate M, Yamamoto M, et al. Persistent activation of Nrf2 through p62 in hepatocellular carcinoma cells. *J Cell Biol*. 2011;193(2):275-84.
- S27. Ezaki J, Matsumoto N, Takeda-Ezaki M, Komatsu M, Takahashi K, Hiraoka Y, Taka H, Fujimura T, Takehana K, Yoshida M, et al. Liver autophagy contributes to the maintenance of blood glucose and amino acid levels. *Autophagy*. 2011;7(7):727-36.

- S28. Cadwell K, Patel KK, Komatsu M, Virgin HW, and Stappenbeck TS. A common role for Atg16L1, Atg5 and Atg7 in small intestinal Paneth cells and Crohn disease. *Autophagy*. 2009;5(2):250-2.
- S29. Komatsu M, Waguri S, Chiba T, Murata S, Iwata J, Tanida I, Ueno T, Koike M, Uchiyama Y, Kominami E, et al. Loss of autophagy in the central nervous system causes neurodegeneration in mice. *Nature*. 2006;441(7095):880-4.
- S30. Komatsu M, Wang QJ, Holstein GR, Friedrich VL, Jr., Iwata J, Kominami E, Chait BT, Tanaka K, and Yue Z. Essential role for autophagy protein Atg7 in the maintenance of axonal homeostasis and the prevention of axonal degeneration. *Proc Natl Acad Sci U S A*. 2007;104(36):14489-94.
- S31. Portillo JA, Okenka G, Reed E, Subauste A, Van Grol J, Gentil K, Komatsu M, Tanaka K, Landreth G, Levine B, et al. The CD40-autophagy pathway is needed for host protection despite IFN-Gamma-dependent immunity and CD40 induces autophagy via control of P21 levels. *PLoS One*. 2010;5(12):e14472.
- S32. Mortensen M, Ferguson DJ, Edelmann M, Kessler B, Morten KJ, Komatsu M, and Simon AK. Loss of autophagy in erythroid cells leads to defective removal of mitochondria and severe anemia in vivo. *Proc Natl Acad Sci U S A*. 2010;107(2):832-7.
- S33. Mortensen M, Soilleux EJ, Djordjevic G, Tripp R, Lutteropp M, Sadighi-Akha E, Stranks AJ, Glanville J, Knight S, Jacobsen SE, et al. The autophagy protein Atg7 is essential for hematopoietic stem cell maintenance. *J Exp Med*. 2011;208(3):455-67.
- S34. Inoue K, Rispoli J, Kaphzan H, Klann E, Chen EI, Kim J, Komatsu M, and Abeliovich A. Macroautophagy deficiency mediates age-dependent neurodegeneration through a phospho-tau pathway. *Mol Neurodegener*. 2012;7(48).
- S35. Jung HS, and Lee MS. Macroautophagy in homeostasis of pancreatic beta-cell. *Autophagy*. 2009;5(2):241-3.
- S36. Masiero E, Agatea L, Mammucari C, Blaauw B, Loro E, Komatsu M, Metzger D, Reggiani C, Schiaffino S, and Sandri M. Autophagy is required to maintain muscle mass. *Cell Metab*. 2009;10(6):507-15.
- S37. Chen M, Hong MJ, Sun H, Wang L, Shi X, Gilbert BE, Corry DB, Kheradmand F, and Wang J. Essential role for autophagy in the maintenance of immunological memory against influenza infection. *Nat Med*. 2014;20(5):503-10.
- S38. Cadwell K, Liu JY, Brown SL, Miyoshi H, Loh J, Lennerz JK, Kishi C, Kc W, Carrero JA, Hunt S, et al. A key role for autophagy and the autophagy gene *Atg16l1* in mouse and human intestinal Paneth cells. *Nature*. 2008;456(7219):259-63.
- S39. Joubert PE, Werneke SW, de la Calle C, Guivel-Benhassine F, Giodini A, Peduto L, Levine B, Schwartz O, Lenschow DJ, and Albert ML. Chikungunya virus-induced autophagy delays caspase-dependent cell death. *J Exp Med*. 2012;209(5):1029-47.
- S40. Saitoh T, Fujita N, Jang MH, Uematsu S, Yang BG, Satoh T, Omori H, Noda T, Yamamoto N, Komatsu M, et al. Loss of the autophagy protein Atg16L1 enhances endotoxin-induced IL-1 $\beta$  production. *Nature*. 2008;456(7219):264-8.
- S41. Murthy A, Li Y, Peng I, Reichelt M, Katakam AK, Noubade R, Roose-Girma M, DeVoss J, Diehl L, Graham RR, et al. A Crohn's disease variant in *Atg16l1* enhances its degradation by caspase 3. *Nature*. 2014;506(7489):456-62.
- S42. Lassen KG, Kuballa P, Conway KL, Patel KK, Becker CE, Peloquin JM, Villablanca EJ, Norman JM, Liu TC, Heath RJ, et al. *Atg16L1* T300A variant decreases selective

- autophagy resulting in altered cytokine signaling and decreased antibacterial defense. *Proc Natl Acad Sci U S A*. 2014;111(21):7741-6.
- S43. Conway KL, Kuballa P, Song JH, Patel KK, Castoreno AB, Yilmaz OH, Jijon HB, Zhang M, Aldrich LN, Villablanca EJ, et al. Atg16l1 is required for autophagy in intestinal epithelial cells and protection of mice from Salmonella infection. *Gastroenterology*. 2013;145(6):1347-57.
- S44. Qu X, Yu J, Bhagat G, Furuya N, Hibshoosh H, Troxel A, Rosen J, Eskelinen EL, Mizushima N, Ohsumi Y, et al. Promotion of tumorigenesis by heterozygous disruption of the *beclin 1* autophagy gene. *J Clin Invest*. 2003;112(12):1809-20.
- S45. Yue Z, Jin S, Yang C, Levine AJ, and Heintz N. *Beclin 1*, an autophagy gene essential for early embryonic development, is a haploinsufficient tumor suppressor. *Proc Natl Acad Sci U S A*. 2003;100(25):15077-82.
- S46. Pickford F, Masliah E, Britschgi M, Lucin K, Narasimhan R, Jaeger PA, Small S, Spencer B, Rockenstein E, Levine B, et al. The autophagy-related protein beclin 1 shows reduced expression in early Alzheimer disease and regulates amyloid beta accumulation in mice. *J Clin Invest*. 2008;118(6):2190-9.
- S47. Tannous P, Zhu H, Johnstone JL, Shelton JM, Rajasekaran NS, Benjamin IJ, Nguyen L, Gerard RD, Levine B, Rothermel BA, et al. Autophagy is an adaptive response in desmin-related cardiomyopathy. *Proc Natl Acad Sci U S A*. 2008;105(28):9745-50.
- S48. Lee SJ, Kim HP, Jin Y, Choi AM, and Ryter SW. Beclin 1 deficiency is associated with increased hypoxia-induced angiogenesis. *Autophagy*. 2011;7(8):829-39.
- S49. Ding Y, Kim SL, Lee SY, Koo JK, Wang Z, and Choi ME. Autophagy regulates TGF-beta expression and suppresses kidney fibrosis induced by unilateral ureteral obstruction. *J Am Soc Nephrol*. 2014.
- S50. Kim SI, Na HJ, Ding Y, Wang Z, Lee SJ, and Choi ME. Autophagy promotes intracellular degradation of type I collagen induced by transforming growth factor (TGF)-beta1. *J Biol Chem*. 2012;287(15):11677-88.
- S51. Feng W, Chang C, Luo D, Su H, Yu S, Hua W, Chen Z, Hu H, and Liu W. Dissection of autophagy in human platelets. *Autophagy*. 2014;10(4):642-51.
- S52. Lee S, Lee SJ, Coronata AA, Fredenburgh LE, Chung SW, Perrella MA, Nakahira K, Ryter SW, and Choi AM. Carbon monoxide confers protection in sepsis by enhancing beclin 1-dependent autophagy and phagocytosis. *Antioxid Redox Signal*. 2014;20(3):432-42.
- S53. Reed M, Morris SH, Jang S, Mukherjee S, Yue Z, and Lukacs NW. Autophagy-inducing protein beclin-1 in dendritic cells regulates CD4 T cell responses and disease severity during respiratory syncytial virus infection. *J Immunol*. 2013;191(5):2526-37.
- S54. He C, Bassik MC, Moresi V, Sun K, Wei Y, Zou Z, An Z, Loh J, Fisher J, Sun Q, et al. Exercise-induced BCL2-regulated autophagy is required for muscle glucose homeostasis. *Nature*. 2012;481(7382):511-5.
- S55. Takahashi Y, Coppola D, Matsushita N, Cuauling HD, Sun M, Sato Y, Liang C, Jung JU, Cheng JQ, Mule JJ, et al. Bif-1 interacts with Beclin 1 through UVRAG and regulates autophagy and tumorigenesis. *Nat Cell Biol*. 2007;9(10):1142-51.
- S56. Liang CC, Wang C, Peng X, Gan B, and Guan JL. Neural-specific deletion of FIP200 leads to cerebellar degeneration caused by increased neuronal death and axon degeneration. *J Biol Chem*. 2010;285(5):3499-509.

- S57. Lee SJ, Smith A, Guo L, Alastalo TP, Li M, Sawada H, Liu X, Chen ZH, Ifedigbo E, Jin Y, et al. Autophagic protein LC3B confers resistance against hypoxia-induced pulmonary hypertension. *Am J Respir Crit Care Med.* 2011;183(5):649-58.
- S58. Lu J, He L, Behrends C, Araki M, Araki K, Jun Wang Q, Catanzaro JM, Friedman SL, Zong WX, Fiel MI, et al. NRBF2 regulates autophagy and prevents liver injury by modulating Atg14L-linked phosphatidylinositol-3 kinase III activity. *Nat Commun.* 2014;5(3920).
- S59. Nemazanyy I, Blaauw B, Paolini C, Caillaud C, Protasi F, Mueller A, Proikas-Cezanne T, Russell RC, Guan KL, Nishino I, et al. Defects of Vps15 in skeletal muscles lead to autophagic vacuolar myopathy and lysosomal disease. *EMBO Mol Med.* 2013;5(6):870-90.
- S60. Zhou X, Wang L, Hasegawa H, Amin P, Han BX, Kaneko S, He Y, and Wang F. Deletion of PIK3C3/Vps34 in sensory neurons causes rapid neurodegeneration by disrupting the endosomal but not the autophagic pathway. *Proc Natl Acad Sci U S A.* 2010;107(20):9424-9.
- S61. Parekh VV, Wu L, Boyd KL, Williams JA, Gaddy JA, Olivares-Villagomez D, Cover TL, Zong WX, Zhang J, and Van Kaer L. Impaired autophagy, defective T cell homeostasis, and a wasting syndrome in mice with a T cell-specific deletion of Vps34. *J Immunol.* 2013;190(10):5086-101.
- S62. Jaber N, Dou Z, Chen JS, Catanzaro J, Jiang YP, Ballou LM, Selinger E, Ouyang X, Lin RZ, Zhang J, et al. Class III PI3K Vps34 plays an essential role in autophagy and in heart and liver function. *Proc Natl Acad Sci U S A.* 2012;109(6):2003-8.
- S63. Zhao H, Zhao YG, Wang X, Xu L, Miao L, Feng D, Chen Q, Kovacs AL, Fan D, and Zhang H. Mice deficient in *Epg5* exhibit selective neuronal vulnerability to degeneration. *J Cell Biol.* 2013;200(6):731-41.
- S64. Tanaka Y, Guhde G, Suter A, Eskelinen EL, Hartmann D, Lullmann-Rauch R, Janssen PM, Blanz J, von Figura K, and Saftig P. Accumulation of autophagic vacuoles and cardiomyopathy in LAMP-2-deficient mice. *Nature.* 2000;406(6798):902-6.
- S65. Settembre C, Fraldi A, Jahreiss L, Spampinato C, Venturi C, Medina D, de Pablo R, Tacchetti C, Rubinsztein DC, and Ballabio A. A block of autophagy in lysosomal storage disorders. *Hum Mol Genet.* 2008;17(1):119-29.
- S66. Manzanillo PS, Ayres JS, Watson RO, Collins AC, Souza G, Rae CS, Schneider DS, Nakamura K, Shiloh MU, and Cox JS. The ubiquitin ligase parkin mediates resistance to intracellular pathogens. *Nature.* 2013;501(7468):512-6.
- S67. Daroszewska A, van 't Hof RJ, Rojas JA, Layfield R, Landao-Basonga E, Rose L, Rose K, and Ralston SH. A point mutation in the ubiquitin-associated domain of SQSMT1 is sufficient to cause a Paget's disease-like disorder in mice. *Hum Mol Genet.* 2011;20(14):2734-44.
- S68. Jiang P, and Mizushima N. Autophagy and human diseases. *Cell Res.* 2014;24(1):69-79.
- S69. Intemann CD, Thye T, Niemann S, Browne EN, Amanua Chinbuah M, Enimil A, Gyapong J, Osei I, Owusu-Dabo E, Helm S, et al. Autophagy gene variant IRGM -261T contributes to protection from tuberculosis caused by *Mycobacterium tuberculosis* but not by *M. africanum* strains. *PLoS Pathog.* 2009;5(9):e1000577.
- S70. Choi AM, Ryter SW, and Levine B. Autophagy in human health and disease. *N Engl J Med.* 2013;368(7):651-62.

- S71. Kang MR, Kim MS, Oh JE, Kim YR, Song SY, Kim SS, Ahn CH, Yoo NJ, and Lee SH. Frameshift mutations of autophagy-related genes *ATG2B*, *ATG5*, *ATG9B* and *ATG12* in gastric and colorectal cancers with microsatellite instability. *J Pathol.* 2009;217(5):702-6.
- S72. Metzger S, Saukko M, Van Che H, Tong L, Puder Y, Riess O, and Nguyen HP. Age at onset in Huntington's disease is modified by the autophagy pathway: implication of the V471A polymorphism in *Atg7*. *Hum Genet.* 2010;128(4):453-9.
- S73. Metzger S, Walter C, Riess O, Roos RA, Nielsen JE, Craufurd D, and Nguyen HP. The V471A polymorphism in autophagy-related gene *ATG7* modifies age at onset specifically in Italian Huntington disease patients. *PLoS One.* 2013;8(7):e68951.
- S74. Strisciuglio C, Miele E, Wildenberg ME, Giugliano FP, Andrezzi M, Vitale A, Capasso F, Camarca A, Barone MV, Staiano A, et al. T300A variant of autophagy *ATG16L1* gene is associated with decreased antigen sampling and processing by dendritic cells in pediatric Crohn's disease. *Inflamm Bowel Dis.* 2013;19(11):2339-48.
- S75. Strisciuglio C, Auricchio R, Martinelli M, Staiano A, Giugliano FP, Andrezzi M, De Rosa M, Giannetti E, Gianfrani C, Izzo P, et al. Autophagy genes variants and paediatric Crohn's disease phenotype: A single-centre experience. *Dig Liver Dis.* 2014.
- S76. Nicoli ER, Dumitrescu T, Uscatu CD, Popescu FD, Streata I, Serban Sosoi S, Ivanov P, Dumitrescu A, Barbalan A, Lungulescu D, et al. Determination of autophagy gene *ATG16L1* polymorphism in human colorectal cancer. *Rom J Morphol Embryol.* 2014;55(1):57-62.
- S77. Raju D, Hussey S, and Jones NL. Crohn disease *ATG16L1* polymorphism increases susceptibility to infection with *Helicobacter pylori* in humans. *Autophagy.* 2012;8(9):1387-8.
- S78. Chen CZ, Ou CY, Wang RH, Lee CH, Lin CC, Chang HY, and Hsiue TR. Association of *Egr-1* and autophagy-related gene polymorphism in men with chronic obstructive pulmonary disease. *J Formos Med Assoc.* 2013.
- S79. Rubinsztein DC, Codogno P, and Levine B. Autophagy modulation as a potential therapeutic target for diverse diseases. *Nat Rev Drug Discov.* 2012;11(9):709-30.
- S80. Saito H, Inazawa J, Saito S, Kasumi F, Koi S, Sagae S, Kudo R, Saito J, Noda K, and Nakamura Y. Detailed deletion mapping of chromosome 17q in ovarian and breast cancers: 2-cM region on 17q21.3 often and commonly deleted in tumors. *Cancer Res.* 1993;53(14):3382-5.
- S81. Gao X, Zacharek A, Salkowski A, Grignon DJ, Sakr W, Porter AT, and Honn KV. Loss of heterozygosity of the *BRCA1* and other loci on chromosome 17q in human prostate cancer. *Cancer Res.* 1995;55(5):1002-5.
- S82. Aita VM, Liang XH, Murty VV, Pincus DL, Yu W, Cayanis E, Kalachikov S, Gilliam TC, and Levine B. Cloning and genomic organization of *beclin 1*, a candidate tumor suppressor gene on chromosome 17q21. *Genomics.* 1999;59(1):59-65.
- S83. Liang XH, Jackson S, Seaman M, Brown K, Kempkes B, Hibshoosh H, and Levine B. Induction of autophagy and inhibition of tumorigenesis by *Beclin 1*. *Nature.* 1999;402(6762):672-6.
- S84. Qiu DM, Wang GL, Chen L, Xu YY, He S, Cao XL, Qin J, Zhou JM, Zhang YX, and E Q. The expression of *beclin-1*, an autophagic gene, in hepatocellular carcinoma associated with clinical pathological and prognostic significance. *BMC Cancer.* 2014;14(1):327.

- S85. Zhou W, Yue C, Deng J, Hu R, Xu J, Feng L, Lan Q, Zhang W, Ji D, Wu J, et al. Autophagic protein Beclin 1 serves as an independent positive prognostic biomarker for non-small cell lung cancer. *PLoS One*. 2013;8(11):e80338.
- S86. Huang L, Wang S, Li SS, and Yang XM. Prognostic significance of Beclin-1 expression in laryngeal squamous cell carcinoma. *Pathol Oncol Res*. 2013;19(4):771-7.
- S87. Lin HX, Qiu HJ, Zeng F, Rao HL, Yang GF, Kung HF, Zhu XF, Zeng YX, Cai MY, and Xie D. Decreased expression of Beclin 1 correlates closely with Bcl-xL expression and poor prognosis of ovarian carcinoma. *PLoS One*. 2013;8(4):e60516.
- S88. Liu GH, Zhong Q, Ye YL, Wang HB, Hu LJ, Qin ZK, Zeng MS, and Zeng BH. Expression of beclin 1 in bladder cancer and its clinical significance. *Int J Biol Markers*. 2013;28(1):56-62.
- S89. He Y, Zhao X, Subahan NR, Fan L, Gao J, and Chen H. The prognostic value of autophagy-related markers beclin-1 and microtubule-associated protein light chain 3B in cancers: a systematic review and meta-analysis. *Tumour Biol*. 2014.
- S90. Gentile M, Ahnstrom M, Schon F, and Wingren S. Candidate tumour suppressor genes at 11q23-q24 in breast cancer: evidence of alterations in *PIG8*, a gene involved in p53-induced apoptosis. *Oncogene*. 2001;20(53):7753-60.
- S91. Oz-Levi D, Ben-Zeev B, Ruzzo EK, Hitomi Y, Gelman A, Pelak K, Anikster Y, Reznik-Wolf H, Bar-Joseph I, Olender T, et al. Mutation in *TECPR2* reveals a role for autophagy in hereditary spastic paraparesis. *Am J Hum Genet*. 2012;91(6):1065-72.
- S92. Saito H, Nishimura T, Muramatsu K, Kodera H, Kumada S, Sugai K, Kasai-Yoshida E, Sawaura N, Nishida H, Hoshino A, et al. De novo mutations in the autophagy gene *WDR45* cause static encephalopathy of childhood with neurodegeneration in adulthood. *Nat Genet*. 2013;45(4):445-9, 9e1.
- S93. Haack TB, Hogarth P, Kruer MC, Gregory A, Wieland T, Schwarzmayr T, Graf E, Sanford L, Meyer E, Kara E, et al. Exome sequencing reveals de novo *WDR45* mutations causing a phenotypically distinct, X-linked dominant form of NBIA. *Am J Hum Genet*. 2012;91(6):1144-9.
- S94. Filimonenko M, Stuffers S, Raiborg C, Yamamoto A, Malerod L, Fisher EM, Isaacs A, Brech A, Stenmark H, and Simonsen A. Functional multivesicular bodies are required for autophagic clearance of protein aggregates associated with neurodegenerative disease. *J Cell Biol*. 2007;179(3):485-500.
- S95. Sagona AP, Nezis IP, and Stenmark H. Association of *CHMP4B* and autophagy with micronuclei: implications for cataract formation. *Biomed Res Int*. 2014;2014(974393).
- S96. Shiels A, Bennett TM, Knopf HL, Yamada K, Yoshiura K, Niikawa N, Shim S, and Hanson PI. *CHMP4B*, a novel gene for autosomal dominant cataracts linked to chromosome 20q. *Am J Hum Genet*. 2007;81(3):596-606.
- S97. Ravikumar B, Acevedo-Arozena A, Imarisio S, Berger Z, Vacher C, O'Kane CJ, Brown SD, and Rubinsztein DC. Dynein mutations impair autophagic clearance of aggregate-prone proteins. *Nat Genet*. 2005;37(7):771-6.
- S98. Cullup T, Kho AL, Dionisi-Vici C, Brandmeier B, Smith F, Urry Z, Simpson MA, Yau S, Bertini E, McClelland V, et al. Recessive mutations in *EPG5* cause Vici syndrome, a multisystem disorder with defective autophagy. *Nat Genet*. 2013;45(1):83-7.

- S99. Kwok AS, Phadwal K, Turner BJ, Oliver PL, Raw A, Simon AK, Talbot K, and Agashe VR. *HspB8* mutation causing hereditary distal motor neuropathy impairs lysosomal delivery of autophagosomes. *J Neurochem.* 2011;119(6):1155-61.
- S100. Nishino I, Fu J, Tanji K, Yamada T, Shimojo S, Koori T, Mora M, Riggs JE, Oh SJ, Koga Y, et al. Primary LAMP-2 deficiency causes X-linked vacuolar cardiomyopathy and myopathy (Danon disease). *Nature.* 2000;406(6798):906-10.
- S101. Liang C, Feng P, Ku B, Dotan I, Canaani D, Oh BH, and Jung JU. Autophagic and tumour suppressor activity of a novel Beclin1-binding protein UVRAG. *Nat Cell Biol.* 2006;8(7):688-99.
- S102. Kimonis VE, Mehta SG, Fulchiero EC, Thomasova D, Pasquali M, Boycott K, Neilan EG, Kartashov A, Forman MS, Tucker S, et al. Clinical studies in familial VCP myopathy associated with Paget disease of bone and frontotemporal dementia. *Am J Med Genet A.* 2008;146A(6):745-57.
- S103. Tresse E, Salomons FA, Vesa J, Bott LC, Kimonis V, Yao TP, Dantuma NP, and Taylor JP. VCP/p97 is essential for maturation of ubiquitin-containing autophagosomes and this function is impaired by mutations that cause IBMPFD. *Autophagy.* 2010;6(2):217-27.
- S104. Vantaggiato C, Crimella C, Airoldi G, Polishchuk R, Bonato S, Brighina E, Scarlato M, Musumeci O, Toscano A, Martinuzzi A, et al. Defective autophagy in spastizin mutated patients with hereditary spastic paraparesis type 15. *Brain.* 2013;136(Pt 10):3119-39.
- S105. Xu L, Lin DC, Yin D, and Koeffler HP. An emerging role of PARK2 in cancer. *J Mol Med (Berl).* 2014;92(1):31-42.
- S106. Mira MT, Alcais A, Nguyen VT, Moraes MO, Di Flumeri C, Vu HT, Mai CP, Nguyen TH, Nguyen NB, Pham XK, et al. Susceptibility to leprosy is associated with PARK2 and PACRG. *Nature.* 2004;427(6975):636-40.
- S107. Ali S, Vollaard AM, Widjaja S, Surjadi C, van de Vosse E, and van Dissel JT. PARK2/PACRG polymorphisms and susceptibility to typhoid and paratyphoid fever. *Clin Exp Immunol.* 2006;144(3):425-31.
- S108. Goode A, Long JE, Shaw B, Ralston SH, Visconti MR, Gianfrancesco F, Esposito T, Gennari L, Merlotti D, Rendina D, et al. Paget disease of bone-associated UBA domain mutations of SQSTM1 exert distinct effects on protein structure and function. *Biochim Biophys Acta.* 2014;1842(7):992-1000.
- S109. Rea SL, Majcher V, Searle MS, and Layfield R. SQSTM1 mutations - Bridging Paget disease of bone and ALS/FTLD. *Exp Cell Res.* 2014;325(1):27-37.
- S110. Franke A, Balschun T, Sina C, Ellinghaus D, Hasler R, Mayr G, Albrecht M, Wittig M, Buchert E, Nikolaus S, et al. Genome-wide association study for ulcerative colitis identifies risk loci at 7q22 and 22q13 (IL17REL). *Nat Genet.* 2010;42(4):292-4.
- S111. Pyo JO, Yoo SM, Ahn HH, Nah J, Hong SH, Kam TI, Jung S, and Jung YK. Overexpression of Atg5 in mice activates autophagy and extends lifespan. *Nat Commun.* 2013;4(2300).
- S112. Zhang C, and Cuervo AM. Restoration of chaperone-mediated autophagy in aging liver improves cellular maintenance and hepatic function. *Nat Med.* 2008;14(9):959-65.



- S113. Yang L, Li P, Fu S, Calay ES, and Hotamisligil GS. Defective hepatic autophagy in obesity promotes ER stress and causes insulin resistance. *Cell Metab.* 2010;11(6):467-78.
- S114. Pastore N, Blumenkamp K, Annunziata F, Piccolo P, Mithbaekar P, Maria Sepe R, Vetrini F, Palmer D, Ng P, Polishchuk E, et al. Gene transfer of master autophagy regulator TFEB results in clearance of toxic protein and correction of hepatic disease in alpha-1-anti-trypsin deficiency. *EMBO Mol Med.* 2013;5(3):397-412.
- S115. Settembre C, De Cegli R, Mansueto G, Saha PK, Vetrini F, Visvikis O, Huynh T, Carissimo A, Palmer D, Klisch TJ, et al. TFEB controls cellular lipid metabolism through a starvation-induced autoregulatory loop. *Nat Cell Biol.* 2013;15(6):647-58.
- S116. Spanpanato C, Feeney E, Li L, Cardone M, Lim JA, Annunziata F, Zare H, Polishchuk R, Puertollano R, Parenti G, et al. Transcription factor EB (TFEB) is a new therapeutic target for Pompe disease. *EMBO Mol Med.* 2013;5(5):691-706.
- S117. Decressac M, Mattsson B, Weikop P, Lundblad M, Jakobsson J, and Bjorklund A. TFEB-mediated autophagy rescues midbrain dopamine neurons from alpha-synuclein toxicity. *Proc Natl Acad Sci U S A.* 2013;110(19):E1817-26.
- S118. Nascimento-Ferreira I, Nobrega C, Vasconcelos-Ferreira A, Onofre I, Albuquerque D, Aveleira C, Hirai H, Deglon N, and Pereira de Almeida L. Beclin 1 mitigates motor and neuropathological deficits in genetic mouse models of Machado-Joseph disease. *Brain.* 2013;136(Pt 7):2173-88.
- S119. Spencer B, Potkar R, Trejo M, Rockenstein E, Patrick C, Gindi R, Adame A, Wyss-Coray T, and Masliah E. *Beclin 1* gene transfer activates autophagy and ameliorates the neurodegenerative pathology in alpha-synuclein models of Parkinson's and Lewy body diseases. *J Neurosci.* 2009;29(43):13578-88.
- S120. Luciani A, Vilella VR, Esposito S, Brunetti-Pierri N, Medina D, Settembre C, Gavina M, Pulze L, Giardino I, Pettoello-Mantovani M, et al. Defective CFTR induces aggresome formation and lung inflammation in cystic fibrosis through ROS-mediated autophagy inhibition. *Nat Cell Biol.* 2010;12(9):863-75.
- S121. Shin JY, Hong SH, Kang B, Minai-Tehrani A, and Cho MH. Overexpression of beclin1 induced autophagy and apoptosis in lungs of K-rasLA1 mice. *Lung Cancer.* 2013;81(3):362-70.
- S122. Grumati P, Coletto L, Sabatelli P, Cescon M, Angelin A, Bertaggia E, Blaauw B, Urciuolo A, Tiepolo T, Merlini L, et al. Autophagy is defective in collagen VI muscular dystrophies, and its reactivation rescues myofiber degeneration. *Nat Med.* 2010;16(11):1313-20.
- S123. Khandelwal PJ, Herman AM, Hoe HS, Rebeck GW, and Moussa CE. Parkin mediates beclin-dependent autophagic clearance of defective mitochondria and ubiquitinated Abeta in AD models. *Hum Mol Genet.* 2011;20(11):2091-102.
- S124. Shoji-Kawata S, Sumpter R, Leveno M, Campbell GR, Zou Z, Kinch L, Wilkins AD, Sun Q, Pallauf K, MacDuff D, et al. Identification of a candidate therapeutic autophagy-inducing peptide. *Nature.* 2013;494(7436):201-6.
- S125. Lee JS, Li Q, Lee JY, Lee SH, Jeong JH, Lee HR, Chang H, Zhou FC, Gao SJ, Liang C, et al. FLIP-mediated autophagy regulation in cell death control. *Nat Cell Biol.* 2009;11(11):1355-62.
- S126. Hidvegi T, Ewing M, Hale P, Dippold C, Beckett C, Kemp C, Maurice N, Mukherjee A, Goldbach C, Watkins S, et al. An autophagy-enhancing drug promotes degradation of

- mutant alpha1-antitrypsin Z and reduces hepatic fibrosis. *Science*. 2010;329(5988):229-32.
- S127. Sarkar S, Floto RA, Berger Z, Imarisio S, Cordenier A, Pasco M, Cook LJ, and Rubinsztein DC. Lithium induces autophagy by inhibiting inositol monophosphatase. *J Cell Biol*. 2005;170(7):1101-11.
- S128. Williams A, Sarkar S, Cuddon P, Ttofi EK, Saiki S, Siddiqi FH, Jahreiss L, Fleming A, Pask D, Goldsmith P, et al. Novel targets for Huntington's disease in an mTOR-independent autophagy pathway. *Nat Chem Biol*. 2008;4(5):295-305.
- S129. Egan DF, Shackelford DB, Mihaylova MM, Gelino S, Kohnz RA, Mair W, Vasquez DS, Joshi A, Gwinn DM, Taylor R, et al. Phosphorylation of ULK1 (hATG1) by AMP-activated protein kinase connects energy sensing to mitophagy. *Science*. 2011;331(6016):456-61.
- S130. Kim J, Kundu M, Viollet B, and Guan KL. AMPK and mTOR regulate autophagy through direct phosphorylation of Ulk1. *Nat Cell Biol*. 2011;13(2):132-41.
- S131. Kim J, Kim YC, Fang C, Russell RC, Kim JH, Fan W, Liu R, Zhong Q, and Guan KL. Differential regulation of distinct Vps34 complexes by AMPK in nutrient stress and autophagy. *Cell*. 2013;152(1-2):290-303.
- S132. Blommaert EF, Luiken JJ, Blommaert PJ, van Woerkom GM, and Meijer AJ. Phosphorylation of ribosomal protein S6 is inhibitory for autophagy in isolated rat hepatocytes. *J Biol Chem*. 1995;270(5):2320-6.
- S133. Majumder PK, Febbo PG, Bikoff R, Berger R, Xue Q, McMahon LM, Manola J, Brugarolas J, McDonnell TJ, Golub TR, et al. mTOR inhibition reverses Akt-dependent prostate intraepithelial neoplasia through regulation of apoptotic and HIF-1-dependent pathways. *Nat Med*. 2004;10(6):594-601.
- S134. Rose C, Menzies FM, Renna M, Acevedo-Arozena A, Corrochano S, Sadiq O, Brown SD, and Rubinsztein DC. Rilmenidine attenuates toxicity of polyglutamine expansions in a mouse model of Huntington's disease. *Hum Mol Genet*. 2010;19(11):2144-53.
- S135. Lemasters JJ, Nieminen AL, Qian T, Trost LC, Elmore SP, Nishimura Y, Crowe RA, Cascio WE, Bradham CA, Brenner DA, et al. The mitochondrial permeability transition in cell death: a common mechanism in necrosis, apoptosis and autophagy. *Biochim Biophys Acta*. 1998;1366(1-2):177-96.
- S136. Parikh A, Childress C, Deitrick K, Lin Q, Rukstalis D, and Yang W. Statin-induced autophagy by inhibition of geranylgeranyl biosynthesis in prostate cancer PC3 cells. *Prostate*. 2010;70(9):971-81.
- S137. Ma L, Niknejad N, Gorn-Hondermann I, Dayekh K, and Dimitroulakos J. Lovastatin induces multiple stress pathways including LKB1/AMPK activation that regulate its cytotoxic effects in squamous cell carcinoma cells. *PLoS One*. 2012;7(9):e46055.
- S138. Botti J, Djavaheri-Mergny M, Pilatte Y, and Codogno P. Autophagy signaling and the cogwheels of cancer. *Autophagy*. 2006;2(2):67-73.
- S139. Wei Y, Zou Z, Becker N, Anderson M, Sumpter R, Xiao G, Kinch L, Koduru P, Christudass CS, Veltri RW, et al. EGFR-mediated Beclin 1 phosphorylation in autophagy suppression, tumor progression, and tumor chemoresistance. *Cell*. 2013;154(6):1269-84.

- S140. Lonskaya I, Hebron ML, Desforges NM, Franjie A, and Moussa CE. Tyrosine kinase inhibition increases functional parkin-Becn1 interaction and enhances amyloid clearance and cognitive performance. *EMBO Mol Med.* 2013;5(8):1247-62.
- S141. Maiuri MC, Le Toumelin G, Criollo A, Rain JC, Gautier F, Juin P, Tasdemir E, Pierron G, Troulinaki K, Tavernarakis N, et al. Functional and physical interaction between Bcl-X(L) and a BH3-like domain in Becn1. *EMBO J.* 2007;26(10):2527-39.
- S142. Sinha RA, Farah BL, Singh BK, Siddique MM, Li Y, Wu Y, Ilkayeva OR, Gooding J, Ching J, Zhou J, et al. Caffeine stimulates hepatic lipid metabolism by the autophagy-lysosomal pathway in mice. *Hepatology.* 2014;59(4):1366-80.
- S143. Jing K, Song KS, Shin S, Kim N, Jeong S, Oh HR, Park JH, Seo KS, Heo JY, Han J, et al. Docosahexaenoic acid induces autophagy through p53/AMPK/mTOR signaling and promotes apoptosis in human cancer cells harboring wild-type p53. *Autophagy.* 2011;7(11):1348-58.
- S144. Rovito D, Giordano C, Vizza D, Plastina P, Barone I, Casaburi I, Lanzino M, De Amicis F, Sisci D, Mauro L, et al. Omega-3 PUFA ethanolamides DHEA and EPEA induce autophagy through PPARgamma activation in MCF-7 breast cancer cells. *J Cell Physiol.* 2013;228(6):1314-22.
- S145. Opipari AW, Jr., Tan L, Boitano AE, Sorenson DR, Aurora A, and Liu JR. Resveratrol-induced autophagocytosis in ovarian cancer cells. *Cancer Res.* 2004;64(2):696-703.
- S146. Morselli E, Maiuri MC, Markaki M, Megalou E, Pasparaki A, Palikaras K, Criollo A, Galluzzi L, Malik SA, Vitale I, et al. Caloric restriction and resveratrol promote longevity through the Sirtuin-1-dependent induction of autophagy. *Cell Death Dis.* 2010;1(e10).
- S147. Eisenberg T, Knauer H, Schauer A, Buttner S, Ruckenstuhl C, Carmona-Gutierrez D, Ring J, Schroeder S, Magnes C, Antonacci L, et al. Induction of autophagy by spermidine promotes longevity. *Nat Cell Biol.* 2009;11(11):1305-14.
- S148. Hoyer-Hansen M, Bastholm L, Szyniarowski P, Campanella M, Szabadkai G, Farkas T, Bianchi K, Fehrenbacher N, Elling F, Rizzuto R, et al. Control of macroautophagy by calcium, calmodulin-dependent kinase kinase-beta, and Bcl-2. *Mol Cell.* 2007;25(2):193-205.
- S149. Yuk JM, Shin DM, Lee HM, Yang CS, Jin HS, Kim KK, Lee ZW, Lee SH, Kim JM, and Jo EK. Vitamin D3 induces autophagy in human monocytes/macrophages via cathelicidin. *Cell Host Microbe.* 2009;6(3):231-43.
- S150. Sarkar S, Perlstein EO, Imarisio S, Pineau S, Cordenier A, Maglathlin RL, Webster JA, Lewis TA, O'Kane CJ, Schreiber SL, et al. Small molecules enhance autophagy and reduce toxicity in Huntington's disease models. *Nat Chem Biol.* 2007;3(6):331-8.
